# Supplementary material for: Inhibiting NINJ1-dependent plasma membrane rupture protects against inflammasome-induced blood coagulation and inflammation
Source: eLife journal article supplement (doi:10.7554/elife.91329), 2023-10-17

Figure 1–figure supplement 1–source data

Intensity adjusted (right) on the same blot to show weaker bands in Lung

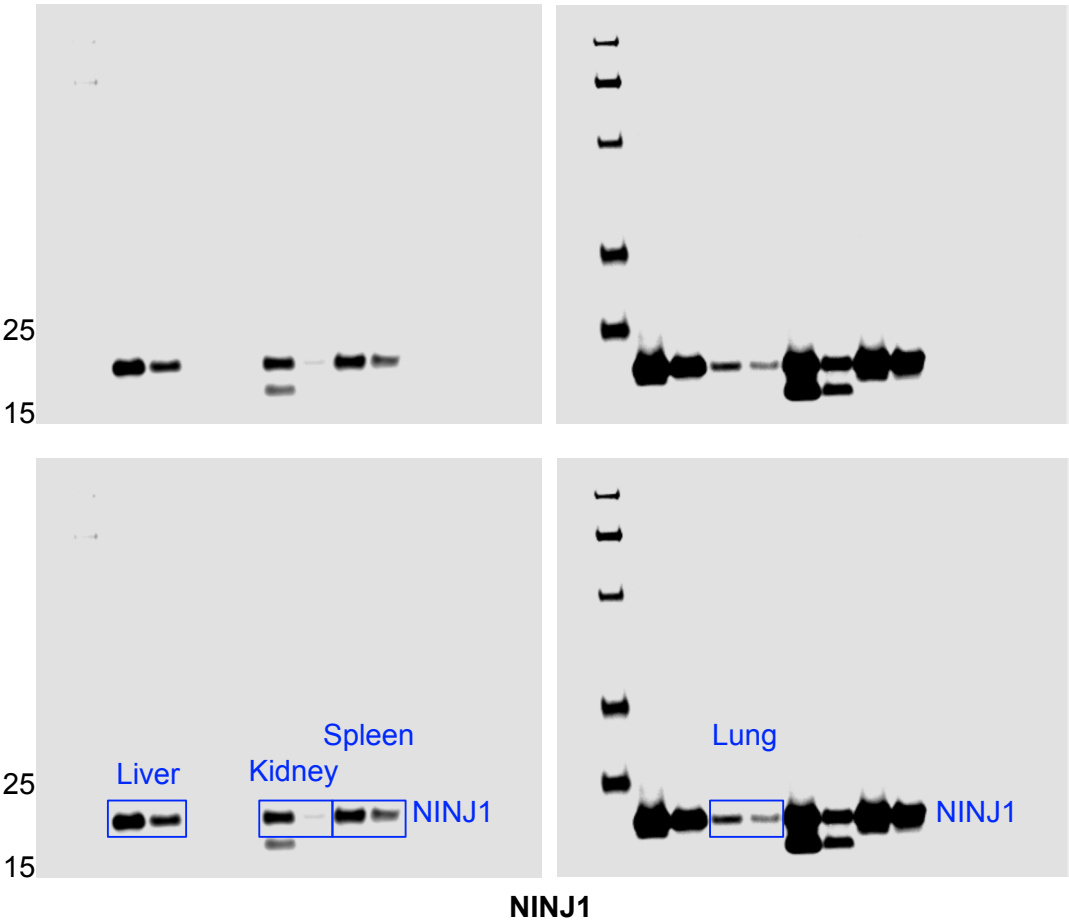

Intensity adjusted (right) on the same blot to show weaker bands in Lung and Kidney

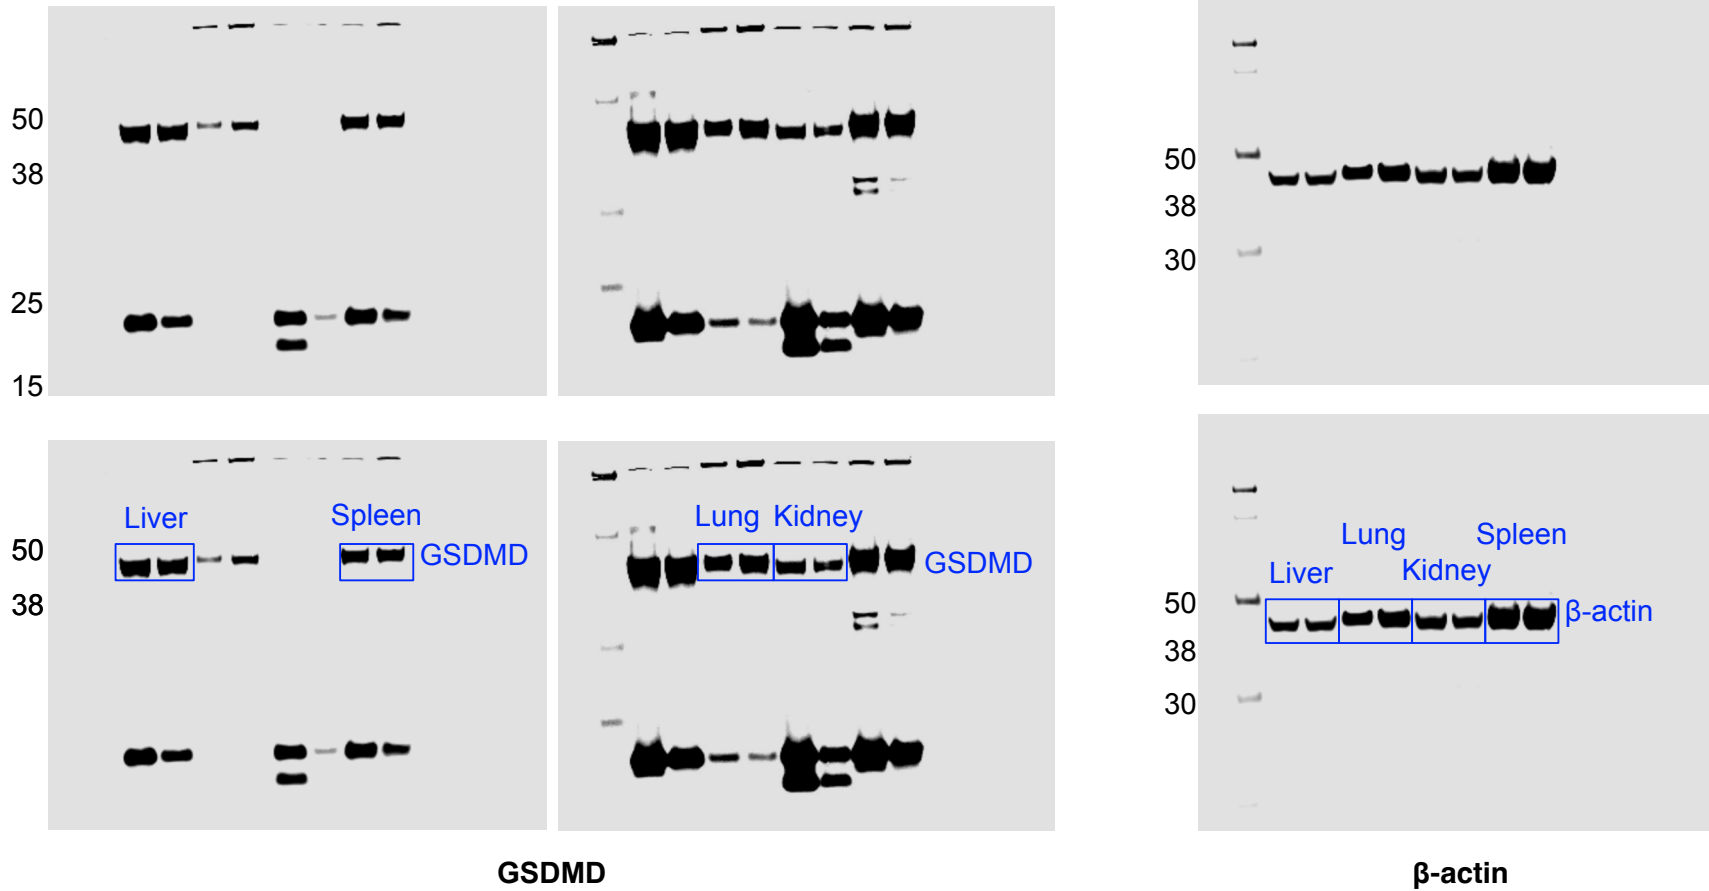

Supplement: fig1-figsupp1-data1 [file elife-91329-fig1-figsupp1-data1-v1.zip]
