# Supplementary material for: Inhibiting NINJ1-dependent plasma membrane rupture protects against inflammasome-induced blood coagulation and inflammation
Source: eLife. 2025 Mar 17;12:RP91329. doi: 10.7554/eLife.91329 (PMC11913443; doi:10.7554/eLife.91329)
Supplement: Figure 1—figure supplement 2—source data 1. [file elife-91329-fig1-figsupp2-data1.xlsx]

## Sheet: Sheet1
Figure 1–figure supplement 2
	A. LDH Release	ctrl	Fla	PA	FlaTox
		13.8008	13.9121	13.6895	62.0479
		12.8691	14.4847	13.9276	60.39
		13.96	14.1268	14.4605	61.5128
		14.2857	14.7236	14.0668	62.7805
