# Supplementary material for: Inhibiting NINJ1-dependent plasma membrane rupture protects against inflammasome-induced blood coagulation and inflammation
Source: eLife. 2025 Mar 17;12:RP91329. doi: 10.7554/eLife.91329 (PMC11913443; doi:10.7554/eLife.91329)
Supplement: Figure 1—source data 1. [file elife-91329-fig1-data1.xlsx]

## Sheet: Sheet1
Figure 1
	A. Prothrombin Time	Ninj1+/+		Ninj1+/-
		ctrl	fla	ctrl	fla
		10.1	16.29	11.14	13.9
		11.15	16.23	11.07	13.44
		11.33	15.49	10.91	14.1
		11.3	16.86	11.19	14.27
		11.63	16.59	10.97	13.36
	B. Plasma TAT	Ninj1+/+		Ninj1+/-
		ctrl	fla	ctrl	fla
		0.8	8.55	0.9	2.79
		1.4	8.07	0.7	3.15
		2.3	7.91	0.8	3.79
		0.6	9	1.1	2.4
		0.9	8.05	1	2
	C. Plasma IL-1β	Ninj1+/+		Ninj1+/-
		ctrl	fla	ctrl	fla
		0.01724	1.21887	0.01545	0.13858
		0.01486	1.34606	0.01644	0.13088
		0.01764	1.24682	0.01177	0.32787
		0.01584	1.23443	0.01215	0.19881
		0.01525	0.9182	0.01584	0.18401
	D. Plasma TNFα	Ninj1+/+		Ninj1+/-
		ctrl	fla	ctrl	fla
		0.13555	0.8562	0.10975	0.30155
		0.12825	0.73385	0.1385	0.3255
		0.1297	0.5054	0.13555	0.3308
		0.13115	0.5043	0.13555	0.28305
		0.2512	0.49195	0.1268	0.2543
	E. Plasma IL-6	Ninj1+/+		Ninj1+/-
		ctrl	fla	ctrl	fla
		0.212	47.9765	0.0393	15.624
		0.2245	55.1475	0.0435	15.413
		0.1621	55.759	0.0393	10.827
		0.3512	55.907	0.0059	21.531
		0.0539	56.212	0.0142	19.2025
	H. Survival	hours	Ninj1+/+	Ninj1+/-
		2	1
		2.5	1
		2.5	1
		2.5	1
		3	1
		3.5		1
		6.5	1
		11	1
		14.5	1
		15.5	1
		16.5		1
		20		1
		22.5		1
		23		1
		48		0
		48		0
