# Supplementary material for: Inhibiting NINJ1-dependent plasma membrane rupture protects against inflammasome-induced blood coagulation and inflammation
Source: eLife. 2025 Mar 17;12:RP91329. doi: 10.7554/eLife.91329 (PMC11913443; doi:10.7554/eLife.91329)
Supplement: Figure 2—source data 1. [file elife-91329-fig2-data1.xlsx]

## Sheet: Sheet1
Figure 2
	A. Prothrombin Time	Ninj1+/+		Ninj1+/-
		ctrl	E.coli	ctrl	E.coli
		11.3	16.12	11.07	13.54
		11.82	15.07	11.19	13.11
		11.84	15.14	11.14	12.59
		11.92	15.71	10.97	12.7
		11.15	15.12	10.91	13.47
	B. Plasma TAT	Ninj1+/+		Ninj1+/-
		ctrl	E.coli	ctrl	E.coli
		0.8	18.5	0.9	14.1
		1.4	16.8	0.7	18.55
		2.3	27.7913	0.8	14.35
		0.6	33.4007	1.1	21.2
		0.9	35	1	7.7
	C. Plasma IL-1β	Ninj1+/+		Ninj1+/-
		ctrl	E.coli	ctrl	E.coli
		0.03235	0.4781	0.03322	0.25528
		0.03548	0.69677	0.02907	0.17008
		0.03254	0.48377	0.03022	0.20828
		0.03138	0.83691	0.03509	0.29694
		0.0308	0.73675	0.02841	0.34622
	D. Plasma TNFα	Ninj1+/+		Ninj1+/-
		ctrl	E.coli	ctrl	E.coli
		0.19745	0.4647	0.2042	0.50825
		0.1819	0.4863	0.19075	0.48105
		0.1952	0.41245	0.1841	0.5189
		0.1913	0.60065	0.19465	0.52505
		0.1797	0.745	0.18355	0.4647
	E. Plasma IL-6	Ninj1+/+		Ninj1+/-
		ctrl	E.coli	ctrl	E.coli
		0	72.4295	0	78.299
		0	76.926	0	58.086
		0	49.2115	0	69.1825
		0	93.925	0	82.3065
		0	135.969	0	94.1685
