# Supplementary material for: Inhibiting NINJ1-dependent plasma membrane rupture protects against inflammasome-induced blood coagulation and inflammation
Source: eLife. 2025 Mar 17;12:RP91329. doi: 10.7554/eLife.91329 (PMC11913443; doi:10.7554/eLife.91329)
Supplement: Figure 3—figure supplement 1—source data 1. [file elife-91329-fig3-figsupp1-data1.xlsx]

## Sheet: Sheet1
Figure 3–figure supplement 1
	A. LDH Release	Ninj1+/+		Ninj1+/-				C. BMDM MV Counts		Ninj1+/+		Ninj1+/-
		ctrl	fla	ctrl	fla				Bin centre (nm)	ctrl	fla	ctrl	fla
		13.2187	51.5116	17.3913	32.6087				0.5	0	0	0	0
		14.2857	57.6171	22.0736	28.2609				1.5	0	0	0	0
		13.3373	52.6378	18.7291	30.3512				2.5	0	0	0	0
		12.2703	47.9549	21.8227	28.7625				3.5	0	0	0	0
									4.5	0	0	0	0
									5.5	0	0	0	0
	B. ATP	Ninj1+/+		Ninj1+/-					6.5	0	0	0	0
		ctrl	fla	ctrl	fla				7.5	0	0	0	0
		100	2.14556	100	3.26964				8.5	0	0	0	0
		100	2.22842	100	3.45721				9.5	25	0	0	0
		100	2.03703	100	2.93534				10.5	359	0	0	0
		100	2.40415	100	3.60553				11.5	1810	8	0	0
									12.5	4051	109	0	0
									13.5	4814	775	0	0
									14.5	3552	3197	0	0
									15.5	1870	8494	0	0
									16.5	798	15872	0	0
									17.5	310	22449	0	0
									18.5	121	25587	0	0
									19.5	52	24788	0	0
									20.5	27	21360	0	0
									21.5	17	17012	0	0
									22.5	13	12932	0	0
									23.5	13	9632	0	0
									24.5	16	7178	0	0
									25.5	23	5440	0	0
									26.5	39	4242	0	0
									27.5	70	3430	0	0
									28.5	134	2890	0	0
									29.5	259	2540	0	0
									30.5	492	2330	0	0
									31.5	902	2225	0	0
									32.5	1563	2204	0	0
									33.5	2537	2257	0	2
									34.5	3827	2376	0	3
									35.5	5343	2561	0	5
									36.5	6901	2811	1	7
									37.5	8264	3128	3	12
									38.5	9213	3513	7	19
									39.5	9635	3966	14	31
									40.5	9575	4485	27	48
									41.5	9260	5065	50	75
									42.5	9070	5697	90	117
									43.5	9468	6371	156	181
									44.5	10842	7076	260	277
									45.5	13321	7803	418	423
									46.5	16648	8546	654	640
									47.5	20244	9307	996	965
									48.5	23466	10095	1490	1450
									49.5	25912	10930	2204	2174
									50.5	27618	11843	3244	3253
									51.5	29017	12884	4763	4860
									52.5	30762	14133	6966	7239
									53.5	33496	15723	10101	10728
									54.5	37683	17878	14437	15776
									55.5	43528	20948	20243	22959
									56.5	50987	25444	27782	32972
									57.5	59830	32074	37322	46625
									58.5	69733	41773	49168	64917
									59.5	80385	55763	63703	89759
									60.5	91585	75598	81407	126465
									61.5	103317	103139	102861	187124
									62.5	115808	140420	128699	288483
									63.5	129565	189672	159534	440380
									64.5	145372	254005	195850	635971
									65.5	164225	339236	237909	856968
									66.5	187192	456677	285722	1087672
									67.5	215162	625656	339172	1322202
									68.5	248560	873476	398285	1561254
									69.5	287122	1230231	463555	1805863
									70.5	329892	1717618	536076	2054570
									71.5	375549	2334958	617331	2304508
									72.5	423011	3049956	708744	2553766
									73.5	472133	3801945	811298	2802833
									74.5	524204	4519140	925438	3054644
									75.5	582031	5142306	1051152	3313998
									76.5	649591	5642751	1187980	3587373
									77.5	731343	6026393	1334785	3883636
									78.5	831410	6324436	1489382	4215151
									79.5	952761	6577787	1648278	4597911
									80.5	1096491	6823133	1806739	5049245
									81.5	1261237	7085022	1959258	5582867
									82.5	1442758	7374157	2100326	6203036
									83.5	1633733	7689800	2225315	6900832
									84.5	1823925	8023868	2331224	7654739
									85.5	2000934	8365091	2417163	8435252
									86.5	2151740	8702479	2484480	9210883
									87.5	2264985	9027828	2536542	9952736
									88.5	2333481	9337254	2578185	10636442
									89.5	2356069	9631661	2614883	11242373
									90.5	2337995	9916117	2651720	11755894
									91.5	2289549	10198177	2692370	12168848
									92.5	2223448	10485504	2738364	12482191
									93.5	2152008	10783373	2788935	12708748
									94.5	2084996	11092773	2841521	12874860
									95.5	2028631	11409627	2892794	13020064
									96.5	1985635	11725173	2939814	13194505
									97.5	1955909	12026975	2980903	13454124
									98.5	1937435	12299794	3015954	13853779
									99.5	1927114	12525759	3046185	14438592
									100.5	1921413	12684016	3073531	15234200
									101.5	1916840	12750801	3099958	16237526
									102.5	1910258	12701270	3126939	17410660
									103.5	1899100	12513806	3155162	18680846
									104.5	1881509	12176154	3184468	19948426
									105.5	1856408	11691233	3213921	21101921
									106.5	1823526	11079916	3241943	22036362
									107.5	1783350	10379020	3266452	22669239
									108.5	1737046	9634795	3285012	22949577
									109.5	1686338	8894207	3294982	22858965
									110.5	1633363	8197018	3293700	22407019
									111.5	1580550	7570924	3278687	21625316
									112.5	1530506	7030419	3247864	20562781
									113.5	1485954	6578596	3199751	19282788
									114.5	1449690	6210448	3133643	17860145
									115.5	1424547	5916302	3049748	16375858
									116.5	1413314	5684591	2949273	14909177
									117.5	1418535	5503656	2834459	13528511
									118.5	1442136	5362708	2708534	12283920
									119.5	1484829	5252177	2575552	11203456
									120.5	1545386	5163727	2440103	10294047
									121.5	1619951	5090127	2306922	9545952
									122.5	1701728	5025124	2180450	8938876
									123.5	1781365	4963355	2064447	8447898
									124.5	1848209	4900330	1961737	8048046
									125.5	1892274	4832451	1874124	7717142
									126.5	1906385	4757049	1802491	7437154
									127.5	1887799	4672400	1746998	7194516
									128.5	1838683	4577706	1707330	6979859
									129.5	1765322	4473045	1682885	6787485
									130.5	1676372	4359288	1672844	6614758
									131.5	1580829	4237998	1676073	6461489
									132.5	1486349	4111339	1690835	6329338
									133.5	1398316	3981993	1714390	6221232
									134.5	1319684	3853094	1742600	6140778
									135.5	1251363	3728192	1769783	6091679
									136.5	1192860	3611228	1789074	6077150
									137.5	1142899	3506534	1793485	6099358
									138.5	1099893	3418818	1777551	6158927
									139.5	1062233	3353138	1739111	6254568
									140.5	1028425	3314796	1680445	6382895
									141.5	997137	3309106	1608101	6538483
									142.5	967204	3340951	1531226	6714181
									143.5	937626	3414074	1458991	6901645
									144.5	907587	3530116	1398162	7092056
									145.5	876469	3687495	1351785	7276933
									146.5	843883	3880395	1319313	7449022
									147.5	809686	4098220	1297784	7603175
									148.5	773986	4325914	1283341	7737139
									149.5	737121	4545356	1272447	7851965
									150.5	699616	4737793	1262527	7951660
									151.5	662124	4886832	1252100	8041633
									152.5	625350	4981284	1240592	8125860
									153.5	589988	5017058	1228024	8203337
									154.5	556650	4997577	1214707	8265245
									155.5	525827	4932644	1200994	8294667
									156.5	497855	4836128	1187099	8270173
									157.5	472908	4723168	1172996	8172941
									158.5	451005	4607622	1158375	7995052
									159.5	432025	4500279	1142670	7745387
									160.5	415733	4408033	1125132	7450109
									161.5	401808	4333941	1104939	7146990
									162.5	389874	4277885	1081330	6875636
									163.5	379523	4237516	1053724	6667290
									164.5	370349	4209223	1021830	6537721
									165.5	361963	4188933	985706	6484958
									166.5	354024	4172696	945783	6491606
									167.5	346250	4157035	902828	6530119
									168.5	338439	4139111	857878	6569047
									169.5	330474	4116762	812141	6578755
									170.5	322332	4088455	766886	6535709
									171.5	314077	4053202	723336	6425037
									172.5	305856	4010470	682571	6241375
									173.5	297887	3960085	645463	5988227
									174.5	290436	3902165	612634	5676182
									175.5	283802	3837063	584440	5320430
									176.5	278296	3765329	560986	4938101
									177.5	274214	3687692	542155	4545863
									178.5	271817	3605042	527648	4158134
									179.5	271309	3518420	517037	3786068
									180.5	272813	3428999	509814	3437277
									181.5	276348	3338050	505439	3116130
									182.5	281815	3246896	503387	2824396
									183.5	288983	3156848	503171	2562002
									184.5	297491	3069129	504373	2327748
									185.5	306859	2984792	506647	2119856
									186.5	316522	2904649	509719	1936353
									187.5	325875	2829212	513373	1775283
									188.5	334324	2758659	517437	1634798
									189.5	341349	2692838	521767	1513181
									190.5	346556	2631291	526251	1408826
									191.5	349714	2573315	530814	1320217
									192.5	350774	2518035	535446	1245917
									193.5	349859	2464493	540219	1184564
									194.5	347242	2411731	545280	1134885
									195.5	343302	2358870	550786	1095720
									196.5	338470	2305175	556770	1066043
									197.5	333189	2250102	562958	1044986
									198.5	327868	2193326	568591	1031856
									199.5	322857	2134752	572334	1026146
									200.5	318428	2074506	572371	1027529
									201.5	314780	2012919	566707	1035858
									202.5	312034	1950496	553637	1051145
									203.5	310253	1887873	532251	1073553
									204.5	309450	1825776	502795	1103375
									205.5	309598	1764976	466758	1141029
									206.5	310645	1706244	426633	1187060
									207.5	312513	1650318	385429	1242141
									208.5	315110	1597865	346083	1307086
									209.5	318324	1549460	310959	1382841
									210.5	322028	1505576	281545	1470427
									211.5	326075	1466577	258392	1570811
									212.5	330298	1432720	241256	1684656
									213.5	334507	1404170	229358	1811947
									214.5	338485	1381009	221655	1951511
									215.5	341988	1363257	217081	2100515
									216.5	344753	1350884	214694	2254098
									217.5	346495	1343822	213755	2405309
									218.5	346930	1341970	213739	2545509
									219.5	345786	1345190	214312	2665294
									220.5	342829	1353291	215277	2755835
									221.5	337883	1366001	216528	2810359
									222.5	330863	1382933	217993	2825416
									223.5	321784	1403542	219596	2801567
									224.5	310775	1427076	221217	2743296
									225.5	298078	1452543	222673	2658173
									226.5	284031	1478684	223712	2555491
									227.5	269046	1503975	224021	2444755
									228.5	253572	1526664	223256	2334357
									229.5	238062	1544845	221082	2230695
									230.5	222943	1556567	217229	2137805
									231.5	208582	1559972	211541	2057440
									232.5	195277	1553458	204022	1989448
									233.5	183239	1535827	194861	1932288
									234.5	172600	1506419	184422	1883544
									235.5	163416	1465193	173219	1840380
									236.5	155676	1412753	161855	1799893
									237.5	149318	1350311	150947	1759386
									238.5	144234	1279587	141054	1716575
									239.5	140288	1202657	132617	1669730
									240.5	137317	1121790	125912	1617776
									241.5	135142	1039263	121044	1560327
									242.5	133574	957215	117954	1497676
									243.5	132416	877526	116451	1430704
									244.5	131474	801748	116253	1360755
									245.5	130559	731084	117032	1289455
									246.5	129500	666403	118449	1218525
									247.5	128147	608295	120186	1149599
									248.5	126378	557139	121968	1084071
									249.5	124108	513165	123572	1022992
									250.5	121288	476523	124834	967022
									251.5	117910	447313	125649	916431
									252.5	114001	425606	125971	871146
									253.5	109621	411420	125802	830820
									254.5	104855	404680	125190	794928
									255.5	99807	405153	124217	762842
									256.5	94588	412370	122991	733911
									257.5	89314	425559	121632	707518
									258.5	84092	443599	120263	683115
									259.5	79023	465015	118999	660251
									260.5	74192	488021	117937	638574
									261.5	69671	510623	117150	617831
									262.5	65518	530775	116681	597864
									263.5	61779	546559	116541	578592
									264.5	58487	556379	116711	560003
									265.5	55671	559127	117143	542143
									266.5	53351	554293	117769	525108
									267.5	51545	542010	118503	509032
									268.5	50268	523014	119250	494082
									269.5	49530	498530	119915	480454
									270.5	49340	470116	120409	468370
									271.5	49702	439468	120652	458068
									272.5	50610	408244	120583	449804
									273.5	52050	377907	120159	443843
									274.5	53990	349622	119360	440452
									275.5	56383	324204	118186	439888
									276.5	59160	302107	116659	442388
									277.5	62236	283468	114818	448152
									278.5	65505	268163	112715	457323
									279.5	68854	255882	110414	469968
									280.5	72163	246201	107982	486058
									281.5	75324	238645	105490	505452
									282.5	78246	232740	103002	527889
									283.5	80868	228044	100579	552994
									284.5	83170	224174	98269	580286
									285.5	85171	220812	96114	609222
									286.5	86933	217707	94142	639235
									287.5	88547	214673	92371	669801
									288.5	90128	211582	90808	700495
									289.5	91792	208352	89454	731046
									290.5	93641	204945	88300	761359
									291.5	95746	201355	87332	791503
									292.5	98140	197602	86531	821641
									293.5	100800	193728	85877	851911
									294.5	103658	189790	85343	882262
									295.5	106595	185859	84904	912277
									296.5	109460	182012	84530	941032
									297.5	112079	178332	84193	967039
									298.5	114270	174907	83862	988314
									299.5	115863	171823	83504	1002590
									300.5	116714	169168	83090	1007663
									301.5	116715	167025	82586	1001789
									302.5	115806	165476	81964	984061
									303.5	113977	164598	81194	954641
									304.5	111267	164468	80249	914798
									305.5	107762	165156	79108	866721
									306.5	103583	166734	77751	813148
									307.5	98876	169271	76165	756918
									308.5	93799	172837	74343	700549
									309.5	88513	177504	72283	645940
									310.5	83164	183345	69991	594253
									311.5	77881	190434	67479	545952
									312.5	72767	198846	64765	500981
									313.5	67899	208650	61875	458982
									314.5	63323	219906	58839	419511
									315.5	59063	232659	55690	382196
									316.5	55122	246924	52466	346826
									317.5	51488	262678	49207	313375
									318.5	48138	279846	45952	281969
									319.5	45044	298288	42742	252835
									320.5	42177	317791	39615	226244
									321.5	39510	338055	36607	202445
									322.5	37016	358693	33751	181633
									323.5	34675	379237	31079	163914
									324.5	32472	399150	28617	149298
									325.5	30393	417844	26392	137697
									326.5	28428	434715	24426	128939
									327.5	26572	449175	22743	122782
									328.5	24820	460693	21366	118939
									329.5	23166	468837	20318	117092
									330.5	21610	473306	19627	116918
									331.5	20146	473958	19320	118103
									332.5	18773	470827	19428	120349
									333.5	17486	464118	19980	123392
									334.5	16284	454198	21008	126996
									335.5	15162	441564	22535	130961
									336.5	14117	426809	24577	135119
									337.5	13144	410575	27139	139334
									338.5	12241	393511	30206	143495
									339.5	11404	376228	33743	147519
									340.5	10630	359265	37689	151341
									341.5	9914	343068	41958	154918
									342.5	9255	327970	46437	158225
									343.5	8650	314195	50993	161255
									344.5	8095	301860	55476	164023
									345.5	7589	290989	59726	166565
									346.5	7130	281530	63586	168943
									347.5	6717	273379	66911	171249
									348.5	6347	266390	69576	173610
									349.5	6020	260400	71484	176191
									350.5	5734	255239	72574	179200
									351.5	5491	250738	72820	182887
									352.5	5289	246742	72235	187542
									353.5	5129	243108	70861	193491
									354.5	5012	239713	68770	201073
									355.5	4938	236449	66054	210627
									356.5	4910	233229	62819	222455
									357.5	4930	229982	59179	236794
									358.5	5001	226658	55248	253773
									359.5	5126	223222	51141	273376
									360.5	5308	219659	46965	295419
									361.5	5551	215971	42823	319530
									362.5	5862	212183	38810	345162
									363.5	6244	208335	35011	371617
									364.5	6702	204487	31501	398106
									365.5	7243	200720	28345	423827
									366.5	7871	197127	25595	448046
									367.5	8592	193817	23286	470190
									368.5	9410	190911	21440	489915
									369.5	10329	188533	20061	507141
									370.5	11352	186810	19137	522052
									371.5	12481	185860	18640	535040
									372.5	13716	185792	18526	546614
									373.5	15055	186696	18739	557265
									374.5	16494	188634	19215	567337
									375.5	18028	191639	19881	576898
									376.5	19646	195705	20663	585663
									377.5	21338	200789	21486	592966
									378.5	23090	206802	22279	597810
									379.5	24884	213618	22978	598987
									380.5	26701	221067	23526	595243
									381.5	28521	228947	23878	585476
									382.5	30319	237027	24002	568921
									383.5	32070	245058	23877	545297
									384.5	33750	252779	23496	514885
									385.5	35332	259934	22865	478523
									386.5	36790	266278	21998	437522
									387.5	38101	271590	20923	393518
									388.5	39242	275682	19670	348291
									389.5	40191	278409	18279	303573
									390.5	40933	279672	16789	260886
									391.5	41454	279424	15242	221426
									392.5	41744	277670	13678	186004
									393.5	41798	274464	12132	155042
									394.5	41614	269909	10637	128616
									395.5	41196	264146	9219	106528
									396.5	40552	257347	7899	88389
									397.5	39693	249708	6691	73703
									398.5	38635	241439	5603	61934
									399.5	37395	232751	4639	52565
									400.5	35996	223851	3797	45125
									401.5	34460	214933	3073	39210
									402.5	32811	206167	2460	34491
									403.5	31074	197702	1947	30706
									404.5	29274	189652	1524	27658
									405.5	27436	182104	1179	25199
									406.5	25582	175111	903	23226
									407.5	23735	168696	683	21668
									408.5	21915	162853	512	20478
									409.5	20139	157553	379	19629
									410.5	18422	152744	278	19107
									411.5	16778	148360	201	18908
									412.5	15216	144323	144	19031
									413.5	13744	140546	102	19483
									414.5	12368	136943	72	20269
									415.5	11091	133428	50	21394
									416.5	9914	129922	34	22863
									417.5	8836	126352	23	24677
									418.5	7855	122657	16	26834
									419.5	6968	118791	10	29325
									420.5	6171	114717	7	32139
									421.5	5458	110414	4	35256
									422.5	4823	105877	3	38650
									423.5	4261	101110	2	42291
									424.5	3766	96132	1	46138
									425.5	3330	90970	0	50147
									426.5	2949	85660	0	54267
									427.5	2616	80247	0	58443
									428.5	2326	74778	0	62615
									429.5	2073	69302	0	66722
									430.5	1853	63871	0	70702
									431.5	1662	58534	0	74491
									432.5	1495	53338	0	78031
									433.5	1349	48325	0	81265
									434.5	1221	43533	0	84142
									435.5	1109	38993	0	86618
									436.5	1010	34731	0	88657
									437.5	921	30766	0	90231
									438.5	843	27109	0	91322
									439.5	772	23766	0	91920
									440.5	708	20740	0	92028
									441.5	651	18025	0	91654
									442.5	598	15613	0	90818
									443.5	549	13493	0	89547
									444.5	505	11649	0	87875
									445.5	463	10066	0	85841
									446.5	425	8725	0	83490
									447.5	390	7610	0	80870
									448.5	357	6701	0	78031
									449.5	326	5981	0	75023
									450.5	298	5433	0	71897
									451.5	272	5041	0	68704
									452.5	247	4790	0	65491
									453.5	224	4668	0	62302
									454.5	203	4661	0	59181
									455.5	184	4760	0	56165
									456.5	166	4953	0	53288
									457.5	149	5232	0	50580
									458.5	134	5589	0	48068
									459.5	121	6017	0	45773
									460.5	108	6508	0	43713
									461.5	97	7057	0	41902
									462.5	86	7657	0	40347
									463.5	77	8302	0	39056
									464.5	69	8985	0	38029
									465.5	62	9701	0	37264
									466.5	56	10442	0	36755
									467.5	51	11204	0	36492
									468.5	46	11978	0	36462
									469.5	43	12758	0	36648
									470.5	40	13538	0	37030
									471.5	39	14310	0	37584
									472.5	38	15068	0	38286
									473.5	39	15805	0	39106
									474.5	40	16516	0	40017
									475.5	43	17195	0	40988
									476.5	47	17836	0	41993
									477.5	53	18437	0	43007
									478.5	61	18992	0	44010
									479.5	70	19500	0	44990
									480.5	82	19959	0	45946
									481.5	96	20369	0	46889
									482.5	114	20729	0	47845
									483.5	134	21043	0	48861
									484.5	158	21311	0	50001
									485.5	187	21539	0	51345
									486.5	220	21730	0	52995
									487.5	258	21890	0	55061
									488.5	302	22026	0	57656
									489.5	353	22143	0	60888
									490.5	410	22250	0	64845
									491.5	475	22353	0	69577
									492.5	548	22461	0	75084
									493.5	629	22581	0	81304
									494.5	720	22721	0	88097
									495.5	821	22888	0	95247
									496.5	933	23087	0	102462
									497.5	1055	23326	0	109393
									498.5	1188	23610	0	115647
									499.5	1332	23943	0	120825
									500.5	1488	24328	0	124551
									501.5	1655	24768	0	126510
									502.5	1834	25264	0	126478
									503.5	2023	25817	0	124347
									504.5	2223	26426	0	120137
									505.5	2432	27089	0	113996
									506.5	2650	27804	0	106191
									507.5	2876	28566	0	97078
									508.5	3108	29372	0	87072
									509.5	3346	30214	0	76611
									510.5	3587	31089	0	66119
									511.5	3831	31987	0	55973
									512.5	4074	32903	0	46486
									513.5	4316	33828	0	37884
									514.5	4554	34755	0	30312
									515.5	4787	35674	0	23829
									516.5	5012	36578	0	18427
									517.5	5228	37458	0	14042
									518.5	5432	38306	0	10574
									519.5	5623	39114	0	7900
									520.5	5799	39874	0	5889
									521.5	5959	40579	0	4416
									522.5	6102	41222	0	3364
									523.5	6227	41797	0	2634
									524.5	6332	42298	0	2144
									525.5	6418	42720	0	1827
									526.5	6484	43059	0	1634
									527.5	6530	43312	0	1526
									528.5	6557	43475	0	1477
									529.5	6565	43546	0	1468
									530.5	6556	43525	0	1486
									531.5	6530	43410	0	1523
									532.5	6489	43203	0	1574
									533.5	6434	42904	0	1635
									534.5	6367	42515	0	1704
									535.5	6290	42037	0	1781
									536.5	6204	41476	0	1864
									537.5	6113	40833	0	1954
									538.5	6017	40113	0	2051
									539.5	5918	39321	0	2154
									540.5	5819	38461	0	2264
									541.5	5721	37540	0	2381
									542.5	5625	36562	0	2504
									543.5	5533	35534	0	2635
									544.5	5447	34461	0	2774
									545.5	5367	33350	0	2920
									546.5	5293	32207	0	3073
									547.5	5228	31038	0	3234
									548.5	5170	29849	0	3402
									549.5	5119	28646	0	3578
									550.5	5077	27435	0	3761
									551.5	5041	26220	0	3952
									552.5	5013	25009	0	4149
									553.5	4990	23805	0	4353
									554.5	4972	22613	0	4562
									555.5	4958	21438	0	4778
									556.5	4947	20283	0	4998
									557.5	4937	19152	0	5222
									558.5	4928	18049	0	5449
									559.5	4918	16976	0	5679
									560.5	4905	15936	0	5911
									561.5	4889	14930	0	6142
									562.5	4869	13961	0	6372
									563.5	4843	13030	0	6600
									564.5	4810	12138	0	6825
									565.5	4770	11286	0	7044
									566.5	4722	10474	0	7256
									567.5	4665	9702	0	7460
									568.5	4599	8970	0	7654
									569.5	4524	8279	0	7837
									570.5	4439	7627	0	8007
									571.5	4346	7013	0	8162
									572.5	4243	6438	0	8301
									573.5	4133	5899	0	8422
									574.5	4014	5395	0	8524
									575.5	3887	4926	0	8606
									576.5	3754	4490	0	8667
									577.5	3615	4086	0	8706
									578.5	3471	3711	0	8721
									579.5	3323	3365	0	8714
									580.5	3172	3046	0	8682
									581.5	3019	2753	0	8626
									582.5	2865	2484	0	8546
									583.5	2710	2238	0	8443
									584.5	2556	2012	0	8316
									585.5	2403	1807	0	8167
									586.5	2253	1620	0	7996
									587.5	2106	1457	0	7805
									588.5	1963	1379	0	7595
									589.5	1824	2091	0	7368
									590.5	1690	11461	0	7125
									591.5	1562	116740	0	6868
									592.5	1439	1279894	0	6599
									593.5	1323	721	0	6320
									594.5	1212	639	0	6033
									595.5	1108	565	0	5740
									596.5	1011	498	0	5443
									597.5	920	439	0	5144
									598.5	836	387	0	4845
									599.5	758	340	0	4548
									600.5	686	298	0	4255
									601.5	621	262	0	3966
									602.5	561	229	0	3685
									603.5	507	200	0	3411
									604.5	458	175	0	3147
									605.5	414	152	0	2893
									606.5	375	133	0	2650
									607.5	340	116	0	2419
									608.5	309	100	0	2200
									609.5	283	87	0	1994
									610.5	260	76	0	1801
									611.5	240	66	0	1620
									612.5	223	57	0	1453
									613.5	209	49	0	1298
									614.5	197	43	0	1155
									615.5	188	37	0	1024
									616.5	181	33	0	905
									617.5	176	29	0	797
									618.5	172	26	0	699
									619.5	170	23	0	611
									620.5	169	21	0	532
									621.5	170	20	0	461
									622.5	171	19	0	399
									623.5	174	19	0	343
									624.5	178	20	0	295
									625.5	182	22	0	252
									626.5	187	24	0	215
									627.5	192	27	0	182
									628.5	199	31	0	154
									629.5	205	36	0	130
									630.5	213	43	0	109
									631.5	220	51	0	91
									632.5	228	60	0	76
									633.5	237	72	0	63
									634.5	246	87	0	52
									635.5	255	104	0	43
									636.5	264	124	0	35
									637.5	274	148	0	29
									638.5	284	177	0	23
									639.5	294	210	0	19
									640.5	304	249	0	15
									641.5	315	294	0	12
									642.5	325	346	0	10
									643.5	336	407	0	8
									644.5	347	477	0	6
									645.5	358	558	0	5
									646.5	369	650	0	4
									647.5	381	755	0	3
									648.5	392	875	0	2
									649.5	404	1010	0	2
									650.5	415	1163	0	2
									651.5	427	1335	0	1
									652.5	438	1528	0	0
									653.5	450	1744	0	0
									654.5	462	1984	0	0
									655.5	473	2251	0	0
									656.5	485	2546	0	0
									657.5	497	2872	0	0
									658.5	508	3229	0	0
									659.5	519	3621	0	0
									660.5	531	4048	0	0
									661.5	542	4511	0	0
									662.5	553	5014	0	0
									663.5	564	5556	0	0
									664.5	575	6139	0	0
									665.5	586	6764	0	0
									666.5	596	7431	0	0
									667.5	606	8139	0	0
									668.5	616	8890	0	0
									669.5	626	9683	0	0
									670.5	636	10516	0	0
									671.5	645	11389	0	0
									672.5	654	12299	0	0
									673.5	663	13244	0	0
									674.5	671	14222	0	0
									675.5	679	15229	0	0
									676.5	687	16262	0	0
									677.5	695	17318	0	0
									678.5	702	18390	0	0
									679.5	708	19475	0	0
									680.5	715	20568	0	0
									681.5	721	21662	0	0
									682.5	726	22753	0	0
									683.5	731	23833	0	0
									684.5	736	24898	0	0
									685.5	740	25940	0	0
									686.5	744	26954	0	0
									687.5	748	27932	0	0
									688.5	751	28870	0	0
									689.5	753	29760	0	0
									690.5	755	30597	0	0
									691.5	757	31375	0	0
									692.5	758	32089	0	0
									693.5	759	32735	0	0
									694.5	759	33308	0	0
									695.5	759	33804	0	0
									696.5	759	34219	0	0
									697.5	758	34553	0	0
									698.5	756	34801	0	0
									699.5	754	34963	0	0
									700.5	752	35039	0	0
									701.5	749	35028	0	0
									702.5	746	34930	0	0
									703.5	743	34747	0	0
									704.5	739	34481	0	0
									705.5	734	34134	0	0
									706.5	729	33709	0	0
									707.5	724	33210	0	0
									708.5	719	32641	0	0
									709.5	713	32005	0	0
									710.5	707	31308	0	0
									711.5	700	30555	0	0
									712.5	693	29751	0	0
									713.5	686	28901	0	0
									714.5	678	28012	0	0
									715.5	671	27088	0	0
									716.5	663	26136	0	0
									717.5	654	25160	0	0
									718.5	646	24167	0	0
									719.5	637	23163	0	0
									720.5	628	22151	0	0
									721.5	618	21137	0	0
									722.5	609	20127	0	0
									723.5	599	19123	0	0
									724.5	590	18132	0	0
									725.5	580	17155	0	0
									726.5	569	16197	0	0
									727.5	559	15261	0	0
									728.5	549	14349	0	0
									729.5	538	13465	0	0
									730.5	528	12609	0	0
									731.5	517	11784	0	0
									732.5	507	10992	0	0
									733.5	496	10232	0	0
									734.5	485	9507	0	0
									735.5	475	8816	0	0
									736.5	464	8159	0	0
									737.5	453	7537	0	0
									738.5	443	6950	0	0
									739.5	432	6396	0	0
									740.5	421	5876	0	0
									741.5	411	5388	0	0
									742.5	400	4932	0	0
									743.5	390	4506	0	0
									744.5	379	4110	0	0
									745.5	369	3742	0	0
									746.5	359	3402	0	0
									747.5	349	3087	0	0
									748.5	339	2796	0	0
									749.5	329	2529	0	0
									750.5	319	2283	0	0
									751.5	310	2058	0	0
									752.5	300	1852	0	0
									753.5	291	1664	0	0
									754.5	282	1493	0	0
									755.5	273	1338	0	0
									756.5	264	1197	0	0
									757.5	255	1069	0	0
									758.5	247	953	0	0
									759.5	238	849	0	0
									760.5	230	755	0	0
									761.5	222	670	0	0
									762.5	214	594	0	0
									763.5	207	526	0	0
									764.5	199	465	0	0
									765.5	192	411	0	0
									766.5	185	363	0	0
									767.5	178	319	0	0
									768.5	171	281	0	0
									769.5	165	247	0	0
									770.5	158	217	0	0
									771.5	152	190	0	0
									772.5	146	166	0	0
									773.5	140	145	0	0
									774.5	134	127	0	0
									775.5	129	111	0	0
									776.5	124	97	0	0
									777.5	118	84	0	0
									778.5	113	73	0	0
									779.5	108	64	0	0
									780.5	104	55	0	0
									781.5	99	48	0	0
									782.5	95	42	0	0
									783.5	91	36	0	0
									784.5	87	31	0	0
									785.5	83	27	0	0
									786.5	79	23	0	0
									787.5	75	20	0	0
									788.5	72	17	0	0
									789.5	68	15	0	0
									790.5	65	13	0	0
									791.5	62	11	0	0
									792.5	59	9	0	0
									793.5	56	8	0	0
									794.5	53	7	0	0
									795.5	51	6	0	0
									796.5	48	5	0	0
									797.5	46	4	0	0
									798.5	43	4	0	0
									799.5	41	3	0	0
									800.5	39	3	0	0
									801.5	37	2	0	0
									802.5	35	2	0	0
									803.5	33	2	0	0
									804.5	31	1	0	0
									805.5	30	1	0	0
									806.5	28	1	0	0
									807.5	27	0	0	0
									808.5	25	0	0	0
									809.5	24	0	0	0
									810.5	22	0	0	0
									811.5	21	0	0	0
									812.5	20	0	0	0
									813.5	19	0	0	0
									814.5	18	0	0	0
									815.5	17	0	0	0
									816.5	16	0	0	0
									817.5	15	0	0	0
									818.5	14	0	0	0
									819.5	13	0	0	0
									820.5	12	0	0	0
									821.5	12	0	0	0
									822.5	11	0	0	0
									823.5	10	0	0	0
									824.5	10	0	0	0
									825.5	9	0	0	0
									826.5	8	0	0	0
									827.5	8	0	0	0
									828.5	7	0	0	0
									829.5	7	0	0	0
									830.5	7	0	0	0
									831.5	6	0	0	0
									832.5	6	0	0	0
									833.5	5	0	0	0
									834.5	5	0	0	0
									835.5	5	0	0	0
									836.5	4	0	0	0
									837.5	4	0	0	0
									838.5	4	0	0	0
									839.5	4	0	0	0
									840.5	3	0	0	0
									841.5	3	0	0	0
									842.5	3	0	0	0
									843.5	3	0	0	0
									844.5	2	0	0	0
									845.5	2	0	0	0
									846.5	2	0	0	0
									847.5	2	0	0	0
									848.5	2	0	0	0
									849.5	2	0	0	0
									850.5	2	0	0	0
									851.5	2	0	0	0
									852.5	1	0	0	0
									853.5	1	0	0	0
									854.5	1	0	0	0
									855.5	1	0	0	0
									856.5	1	0	0	0
									857.5	0	0	0	0
									858.5	0	0	0	0
									859.5	0	0	0	0
									860.5	0	0	0	0
									861.5	0	0	0	0
									862.5	0	0	0	0
									863.5	0	0	0	0
									864.5	0	0	0	0
									865.5	0	0	0	0
									866.5	0	0	0	0
									867.5	0	0	0	0
									868.5	0	0	0	0
									869.5	0	0	0	0
									870.5	0	0	0	0
									871.5	0	0	0	0
									872.5	0	0	0	0
									873.5	0	0	0	0
									874.5	0	0	0	0
									875.5	0	0	0	0
									876.5	0	0	0	0
									877.5	0	0	0	0
									878.5	0	0	0	0
									879.5	0	0	0	0
									880.5	0	0	0	0
									881.5	0	0	0	0
									882.5	0	0	0	0
									883.5	0	0	0	0
									884.5	0	0	0	0
									885.5	0	0	0	0
									886.5	0	0	0	0
									887.5	0	0	0	0
									888.5	0	0	0	0
									889.5	0	0	0	0
									890.5	0	0	0	0
									891.5	0	0	0	0
									892.5	0	0	0	0
									893.5	0	0	0	0
									894.5	0	0	0	0
									895.5	0	0	0	0
									896.5	0	0	0	0
									897.5	0	0	0	0
									898.5	0	0	0	0
									899.5	0	0	0	0
									900.5	0	0	0	0
									901.5	0	0	0	0
									902.5	0	0	0	0
									903.5	0	0	0	0
									904.5	0	0	0	0
									905.5	0	0	0	0
									906.5	0	0	0	0
									907.5	0	0	0	0
									908.5	0	0	0	0
									909.5	0	0	0	0
									910.5	0	0	0	0
									911.5	0	0	0	0
									912.5	0	0	0	0
									913.5	0	0	0	0
									914.5	0	0	0	0
									915.5	0	0	0	0
									916.5	0	0	0	0
									917.5	0	0	0	0
									918.5	0	0	0	0
									919.5	0	0	0	0
									920.5	0	0	0	0
									921.5	0	0	0	0
									922.5	0	0	0	0
									923.5	0	0	0	0
									924.5	0	0	0	0
									925.5	0	0	0	0
									926.5	0	0	0	0
									927.5	0	0	0	0
									928.5	0	0	0	0
									929.5	0	0	0	0
									930.5	0	0	0	0
									931.5	0	0	0	0
									932.5	0	0	0	0
									933.5	0	0	0	0
									934.5	0	0	0	0
									935.5	0	0	0	0
									936.5	0	0	0	0
									937.5	0	0	0	0
									938.5	0	0	0	0
									939.5	0	0	0	0
									940.5	0	0	0	0
									941.5	0	0	0	0
									942.5	0	0	0	0
									943.5	0	0	0	0
									944.5	0	0	0	0
									945.5	0	0	0	0
									946.5	0	0	0	0
									947.5	0	0	0	0
									948.5	0	0	0	0
									949.5	0	0	0	0
									950.5	0	0	0	0
									951.5	0	0	0	0
									952.5	0	0	0	0
									953.5	0	0	0	0
									954.5	0	0	0	0
									955.5	0	0	0	0
									956.5	0	0	0	0
									957.5	0	0	0	0
									958.5	0	0	0	0
									959.5	0	0	0	0
									960.5	0	0	0	0
									961.5	0	0	0	0
									962.5	0	0	0	0
									963.5	0	0	0	0
									964.5	0	0	0	0
									965.5	0	0	0	0
									966.5	0	0	0	0
									967.5	0	0	0	0
									968.5	0	0	0	0
									969.5	0	0	0	0
									970.5	0	0	0	0
									971.5	0	0	0	0
									972.5	0	0	0	0
									973.5	0	0	0	0
									974.5	0	0	0	0
									975.5	0	0	0	0
									976.5	0	0	0	0
									977.5	0	0	0	0
									978.5	0	0	0	0
									979.5	0	0	0	0
									980.5	0	0	0	0
									981.5	0	0	0	0
									982.5	0	0	0	0
									983.5	0	0	0	0
									984.5	0	0	0	0
									985.5	0	0	0	0
									986.5	0	0	0	0
									987.5	0	0	0	0
									988.5	0	0	0	0
									989.5	0	0	0	0
									990.5	0	0	0	0
									991.5	0	0	0	0
									992.5	0	0	0	0
									993.5	0	0	0	0
									994.5	0	0	0	0
									995.5	0	0	0	0
									996.5	0	0	0	0
									997.5	0	0	0	0
									998.5	0	0	0	0
									999.5	0	0	0	0
