# Supplementary material for: Inhibiting NINJ1-dependent plasma membrane rupture protects against inflammasome-induced blood coagulation and inflammation
Source: eLife. 2025 Mar 17;12:RP91329. doi: 10.7554/eLife.91329 (PMC11913443; doi:10.7554/eLife.91329)
Supplement: Figure 3—source data 3. [file elife-91329-fig3-data3.xlsx]

## Sheet: Sheet1
Figure 3
	B. BMDM MV Counts	Ninj1+/+		Ninj1+/-
		ctrl	fla	ctrl	fla
		203000000	1200000000	188000000	1040000000
		236000000	1230000000	195000000	791000000
		237000000	1240000000	156000000	888000000
		236000000	1110000000	199000000	835000000
		211000000	1260000000	168000000	764000000
		241000000	1320000000	151000000	775000000
		260000000	1170000000	126000000	839000000
		263000000	1210000000	143000000	915000000
		227000000	1260000000	132000000	782000000
		270000000	1390000000	144000000	906000000
	C. Plasma MV Counts	Ninj1+/+		Ninj1+/-
		ctrl	fla	ctrl	fla
		475000000000	674000000000	281000000000	485000000000
		439000000000	664000000000	288000000000	474000000000
		406000000000	680000000000	313000000000	475000000000
		435000000000	592000000000	292000000000	495000000000
		454000000000	660000000000	280000000000	512000000000
		480000000000	705000000000	310000000000	449000000000
		528000000000	812000000000	328000000000	450000000000
		493000000000	737000000000	299000000000	454000000000
		573000000000	770000000000	327000000000	506000000000
		498000000000	756000000000	296000000000	475000000000
	E. BMDM MV TF Activity	Ninj1+/+		Ninj1+/-
		ctrl	fla	ctrl	fla
		1.08374	2.42857	1.07389	1.7931
		0.960591	2.52217	0.950739	1.81281
		1.0936	2.72414	1.04926	1.7537
		0.862069	2.4532	1	1.86699
	F. Plasma MV TF Activity	Ninj1+/+		Ninj1+/-
		ctrl	fla	ctrl	fla
		1.33333	6.16667	1	4.75
		0.416667	4.83333	0.25	8.5
		0.25	22	0	9
		1.5	16.4167	0	0
		1.5	17.9167	0.833333	0
