# Supplementary material for: Inhibiting NINJ1-dependent plasma membrane rupture protects against inflammasome-induced blood coagulation and inflammation
Source: eLife. 2025 Mar 17;12:RP91329. doi: 10.7554/eLife.91329 (PMC11913443; doi:10.7554/eLife.91329)
Supplement: Figure 4—figure supplement 1—source data 1. [file elife-91329-fig4-figsupp1-data1.xlsx]

## Sheet: Sheet1
Figure 4–figure supplement 1
	A. LDH Release	Ctrl		Glycine
		ctrl	fla	ctrl	fla
		9.955	70.695	7.222	11.533
		9.428	66.921	7.782	9.988
		9.882	65.203	9.462	10.475
		10.134	60.544	10.167	11.561
	B. BMDM MV TF Activity	Ctrl		Glycine
		ctrl	fla	ctrl	fla
		1.0519	2.80277	1.23599	1.86021
		0.661592	2.80969	1.26782	1.79654
		1.24014	2.86228	1.23045	2.04291
		1.26644	3.1128	1.30104	2.00692
	C. BMDM MV Counts	Ctrl		Glycine
		ctrl	fla	ctrl	fla
		564000000	1200000000	406000000	702000000
		585000000	1230000000	472000000	728000000
		468000000	1240000000	474000000	755000000
		597000000	1110000000	472000000	596000000
		504000000	1260000000	422000000	707000000
		453000000	1320000000	482000000	745000000
		378000000	1170000000	520000000	847000000
		429000000	1210000000	526000000	733000000
		396000000	1260000000	454000000	906000000
		432000000	1390000000	540000000	849000000
