# Supplementary material for: Inhibiting NINJ1-dependent plasma membrane rupture protects against inflammasome-induced blood coagulation and inflammation
Source: eLife. 2025 Mar 17;12:RP91329. doi: 10.7554/eLife.91329 (PMC11913443; doi:10.7554/eLife.91329)
Supplement: Figure 4—source data 1. [file elife-91329-fig4-data1.xlsx]

## Sheet: Sheet1
Figure 4
	A. Prothrombin Time	Ctrl		Glycine
		ctrl	fla	ctrl	fla
		11.15	16.61	10.71	13.03
		11.82	15.98	10.1	13.91
		11.84	16.23	11.15	13.46
		11.92	16.02	11.33	13.89
		11.76	16.39	11.63	13.97
	B. Plasma TAT	Ctrl		Glycine
		ctrl	fla	ctrl	fla
		0.735645	4.65147	0.657278	4.07473
		0.426384	6.14379	0.592488	3.42063
		0.974595	5.24795	0.907658	5.55382
		1.53887	6.31314	1.23274	4.32679
		0.947769	5.80961	1.00149	3.35664
	C. Plasma MV TF Activity	Ctrl		Glycine
		ctrl	fla	ctrl	fla
		0	4.04494	0.393258	0
		0	5.22472	0	0
		2.92135	5.22472	0.955056	0.955056
		1.74157	5.8427	0	1.51685
		0.337079	2.92135	0	0
	D. Plasma MV Counts	Ctrl		Glycine
		ctrl	fla	ctrl	fla
		82600000000	415000000000	187000000000	435000000000
		96900000000	332000000000	138000000000	452000000000
		103000000000	363000000000	175000000000	492000000000
		96600000000	348000000000	177000000000	515000000000
		94000000000	412000000000	147000000000	497000000000
		88700000000	407000000000	197000000000	553000000000
		77600000000	342000000000	193000000000	551000000000
		131000000000	402000000000	190000000000	489000000000
		95700000000	397000000000	203000000000	540000000000
		99200000000	442000000000	194000000000	540000000000
	E. Plasma IL-1β	Ctrl		Glycine
		ctrl	fla	ctrl	fla
		0.02888	2.61639	0.0346	1.43983
		0.03067	2.38723	0.04155	0.44976
		0.02948	3.81383	0.03389	1.63659
		0.03167	3.36382	0.02605	2.18919
		0.0282	1.9469	0.03007	1.0865
	F. Plasma TNFα	Ctrl		Glycine
		ctrl	fla	ctrl	fla
		0.18225	0.9441	0.1751	0.7282
		0.17035	2.39615	0.1626	0.5276
		0.17745	1.691	0.1649	0.7682
		0.16025	1.5377	0.17825	1.00255
		0.18305	0.9834	0.18145	0.59605
	G. Plasma IL-6	Ctrl		Glycine
		ctrl	fla	ctrl	fla
		0	31.0415	0	35.1315
		0	29.9175	0	21.0645
		0	39.5315	0	36.6085
		0	29.929	0	37.249
		0	16.9795	0	62.7645
