# Supplementary figures and images for: Inhibiting NINJ1-dependent plasma membrane rupture protects against inflammasome-induced blood coagulation and inflammation
Source: eLife journal article supplement (doi:10.7554/elife.91329), 2023-10-17

Figure 1G–source data

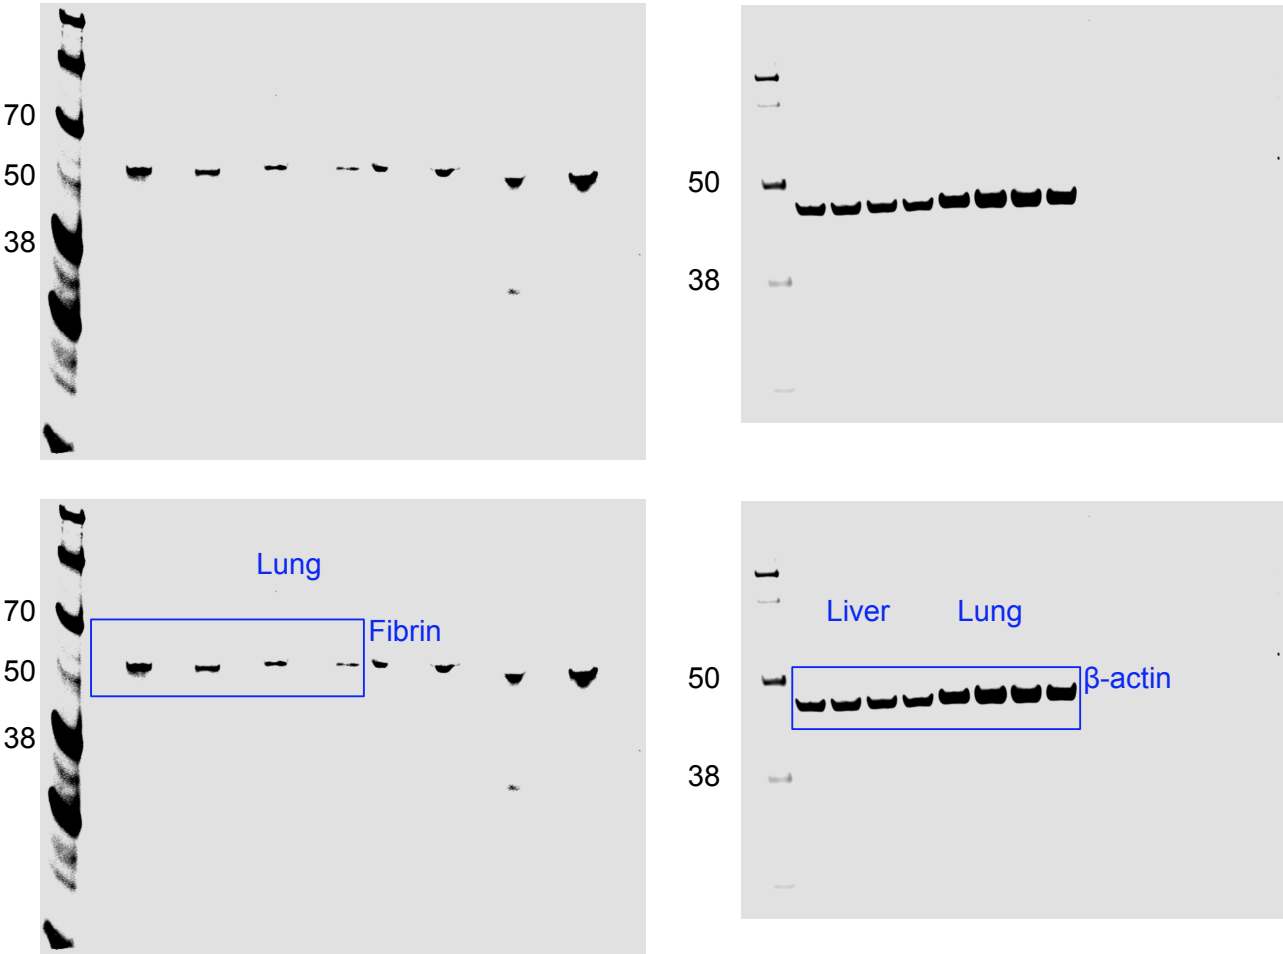

Supplement: fig1-data2 [file elife-91329-fig1-data2-v1.zip]

Figure 1–figure supplement 2B–source data

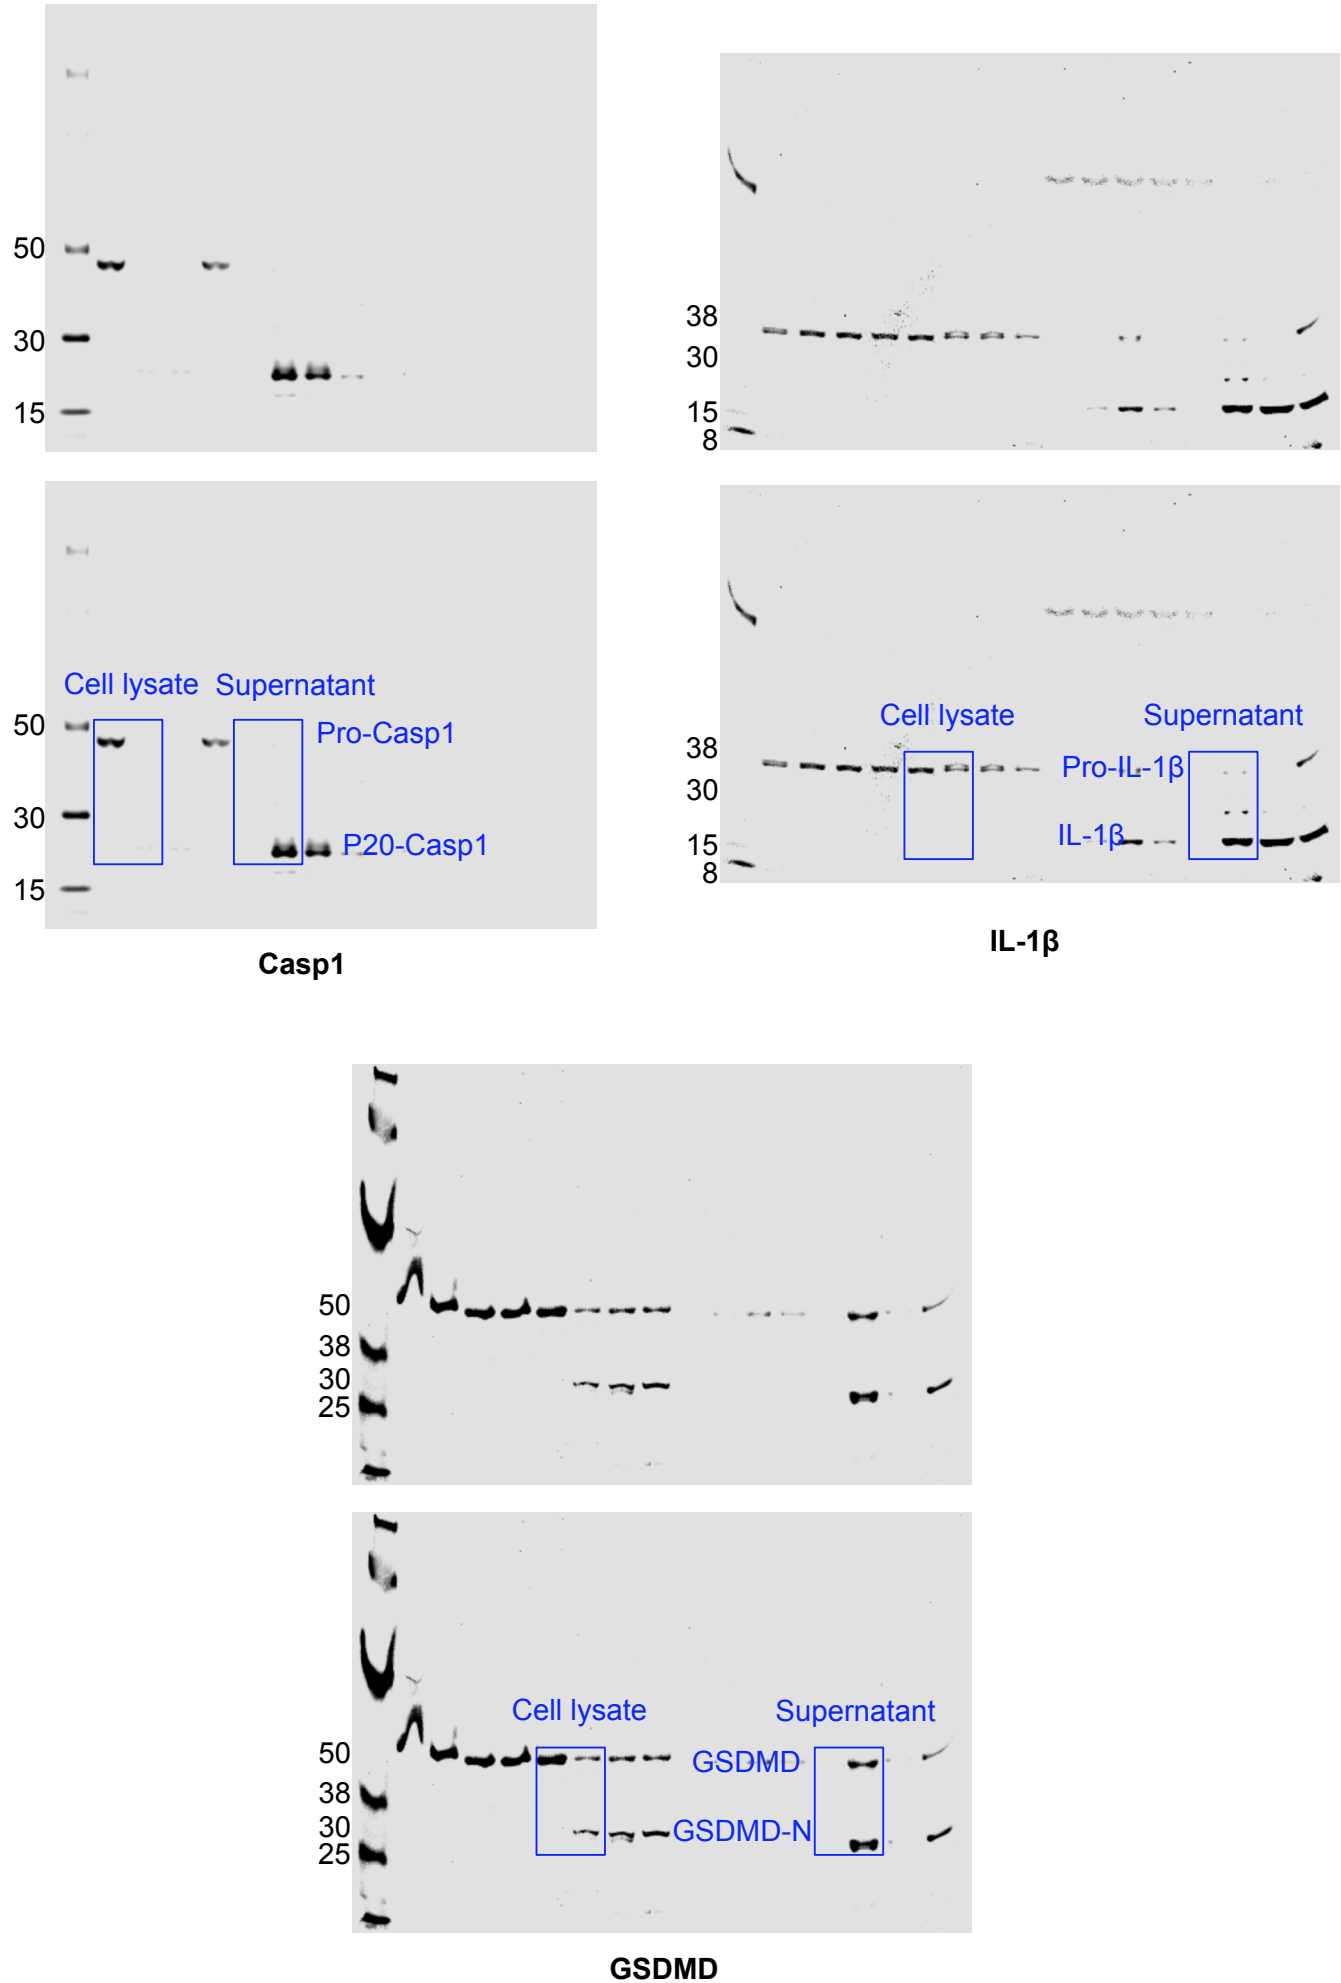

Supplement: fig1-figsupp2-data2 [file elife-91329-fig1-figsupp2-data2-v1.zip]

Figure 3A–source data

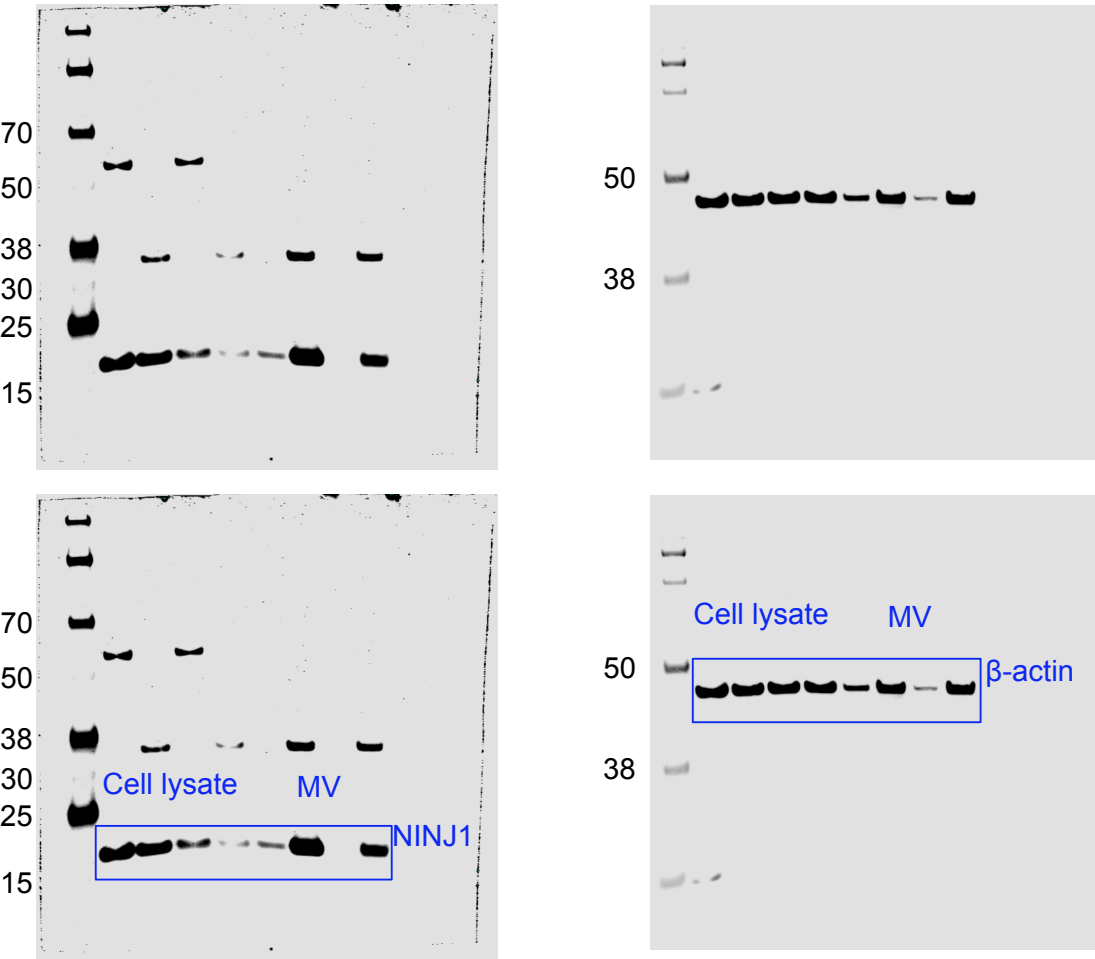

Figure 3D–source data

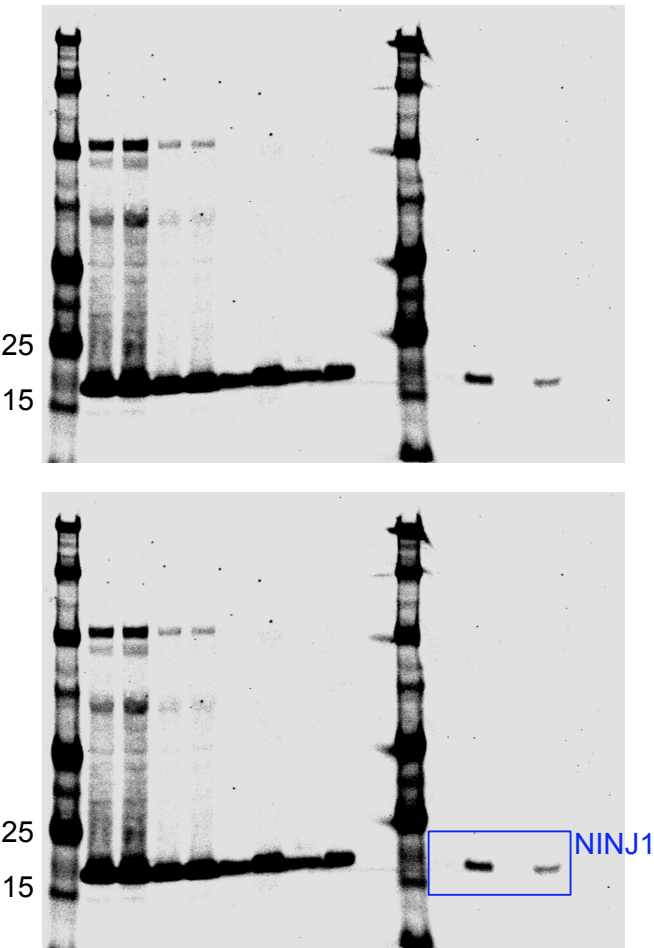

Supplement: fig3-data1 [file elife-91329-fig3-data1-v1.zip]
